# Supplementary material
Source: publisher figshare collection journal article supplement (https://frontiersin.figshare.com/ndownloader/files/15103400)
Supplement: Supplementary file [file 15103400]

## Supporting Information

### Perovskite-WS<sub>2</sub> Nanosheet Composite Optical Absorbers on Graphene as High-Performance Phototransistors

**Dan-Dan Zhang<sup>1</sup>, Rong-Mei Yu<sup>2\*</sup>**

<sup>1</sup>*Institute of Functional Nano & Soft Materials (FUNSOM), Jiangsu Key Laboratory for Carbon-Based Functional Materials & Devices, Soochow University, Suzhou, Jiangsu 215123, P. R. China*

<sup>2</sup>*College of Physics and Electronic Engineering, Nanyang Normal University, Nanyang 473061, China*

\* Email: yurongmei@aliyun.com

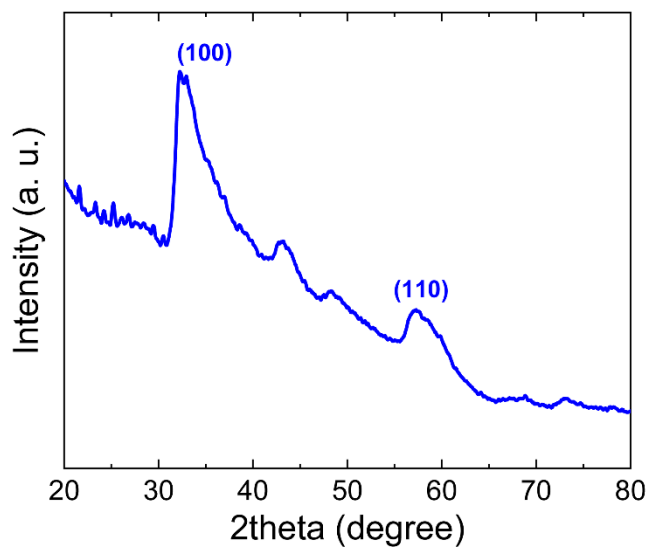

Figure S1 XRD patterns of the WS<sub>2</sub> nanosheets
